# Supplementary material for: Characterization of organoid cultured human breast cancer
Source: PubMed Central journal article supplement (PMC6907265; doi:10.1186/s13058-019-1233-x), 2019-12-11
Supplement: 13058_2019_1233_MOESM1_ESM.pdf [file 13058_2019_1233_MOESM1_ESM.pdf]

## ***Additional file 1. Overview of antibodies used.***

| <b>Antibody</b>             | <b>Conjugate</b> | <b>Clone</b> | <b>Dilution</b> | <b>Company</b>            |
|-----------------------------|------------------|--------------|-----------------|---------------------------|
| <b>FACS</b>                 |                  |              |                 |                           |
| Trop2                       | PE               | 162-46       | 1:50            | BD Biosciences            |
| CD271                       | APC              | Me20.4       | 1:50            | Cedarlane<br>Laboratories |
| <b>Immunohistochemistry</b> |                  |              |                 |                           |
| K14                         | Unconjugated     | LL002        | 1:100           | Monosan                   |
| K19                         | Unconjugated     | Ba16         | 1:100           | Abcam                     |
| K19                         | Unconjugated     | A53-B/A2     | 1:100           | Abcam                     |
| Integrin $\beta$ 4          | Unconjugated     | 3E1          | 1:500           | Chemicon                  |
| Muc1                        | Unconjugated     | 115D8        | 1:10            | Biogenesis                |
| ZO-1                        | Unconjugated     | ZO1-1A12     | 1:25            | Zymed                     |
| Occludin                    | Unconjugated     | 18-7431      | 1:50            | Zymed                     |
| p63                         | Unconjugated     | 7Jul         | 1:10            | Leica                     |
| <b>Secondary antibodies</b> |                  |              |                 |                           |
| Anti-mouse IgG3             | AF488            | Goat         | 1:500           | Life Technologies         |
| Anti-mouse IgG1             | AF568            | Goat         | 1:500           | Life Technologies         |
| Anti-mouse IgG1             | AF488            | Goat         | 1:500           | Life Technologies         |
| Anti-mouse IgG2b            | AF568            | Goat         | 1:500           | Life Technologies         |
| Anti-mouse IgG2a            | AF568            | Goat         | 1:500           | Life Technologies         |
| Anti-rabbit                 | AF488            | Goat         | 1:500           | Life Technologies         |
