# Supplementary material for: Characterization of organoid cultured human breast cancer
Source: PubMed Central journal article supplement (PMC6907265; doi:10.1186/s13058-019-1233-x), 2019-12-11
Supplement: 13058_2019_1233_MOESM3_ESM.pdf [file 13058_2019_1233_MOESM3_ESM.pdf]

***Additional file 3. Overview of breast cancer biopsies and breast cancer-derived organoid cultures included.***

| <b>Biopsy ID</b> | <b>Source</b> | <b>Type</b> | <b>Number of organoid cultures in 24 wells</b> | <b>Days in culture</b> | <b>Organoids for staining</b> |
|------------------|---------------|-------------|------------------------------------------------|------------------------|-------------------------------|
| P1099            | Primary BC    | Luminal     | 7                                              | >30                    | No                            |
| P1100            | Primary BC    | Luminal     | 8                                              | 10                     | Yes                           |
| P1103            | Primary BC    | Luminal     | 10                                             | 34                     | Yes                           |
| P1104            | Primary BC    | Basal       | 7                                              | 23                     | Yes                           |
| P1105            | Primary BC    | Luminal     | 3                                              | >30                    | No                            |
| P1106            | Primary BC    | Luminal     | 6                                              | 28                     | Yes                           |
| P1107            | Primary BC    |             | 6                                              | >30                    | No                            |
| P1109            | Primary BC    | Basal       | 6                                              | 22                     | Yes                           |
| P1110            | Primary BC    | Basal       | 7                                              | >30                    | No                            |
| P821             | Lymph Node    | Luminal     | 8                                              | >30                    | No                            |
