# Supplementary material for: Characterization of organoid cultured human breast cancer
Source: PubMed Central journal article supplement (PMC6907265; doi:10.1186/s13058-019-1233-x), 2019-12-11

**Additional file 4. Primary organoid culture is most representative of the tumor of origin.**

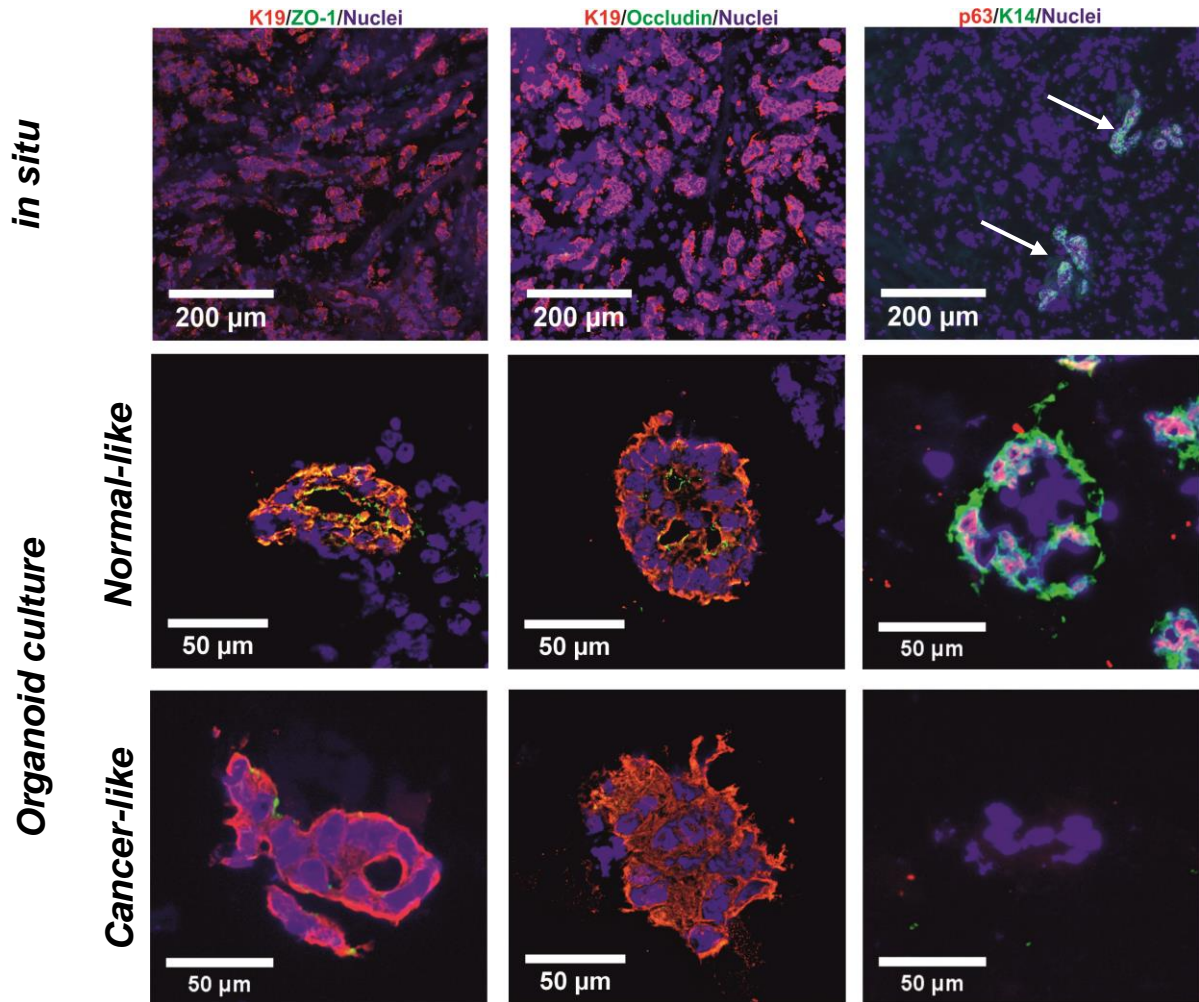

Supplement: 13058_2019_1233_MOESM4_ESM.pdf [file 13058_2019_1233_MOESM4_ESM.pdf]
